# Supplementary material for: Combining Magnetic Resonance Imaging with Systemic Monocyte Evaluation for the Implementation of GBM Management
Source: MDPI journal article supplement (doi:10.3390/ijms22073797), 2021-04-06
Supplement: s1 [file s1]

Table S1

| GE MR imaging protocol |       |         |              |          |                      |
|------------------------|-------|---------|--------------|----------|----------------------|
|                        | Plane | TR (ms) | TE (ms)      | FOV (mm) | Slice thickness (mm) |
| T2 FSE                 | sag   | 3997.0  | 91.0         | 24.0     | 3                    |
| T2 FSE                 | ax    | 3214.0  | 91.0         | 24.0     | 4                    |
| T2 FSE                 | cor   | 3615.0  | 91.0         | 24.0     | 4                    |
| DWI b1000              | ax    | 10265.0 | minimum      | 24.0     | 4                    |
| 3D SWAN                | ax    | minimum | 40.6         | 25.0     | 1.5 (isotropic)      |
| T1 FSE                 | ax    | 512.0   | Min Full     | 24.0     | 4                    |
| FLAIR                  | ax    | 9745.0  | 133.1        | 24.0     | 4                    |
| DSC Perfusion          | ax    | 1500.0  | 35.0         | 24.0     | 4                    |
| T1 fs FSPGR (+C)       | ax    |         | out of Phase | 25.6     | 1.2(isotropic)       |
| T1 FSE (+C)            | ax    | 590.0   | Min Full     | 24.0     | 4                    |

Table S2

| Philips MR imaging protocol |       |           |         |          |                      |
|-----------------------------|-------|-----------|---------|----------|----------------------|
|                             | Plane | TR (ms)   | TE (ms) | FOV (mm) | Slice thickness (mm) |
| T2 TSE                      | sag   | 3000-5500 | 100     | 24.0     | 3                    |
| T2 TSE                      | ax    | 3000-5500 | 100     | 24.0     | 3                    |
| T2 TSE                      | cor   | 3000-5500 | 100     | 24.0     | 3                    |
| DWI b1000                   | ax    | 4927      | 90      | 24.0     | 4                    |
| 3D SWI                      | ax    | 51        | 12      | 24.0     | 1.5(isotropic)       |
| T1 TSE                      | ax    | 400-680   | 12      | 24.0     | 4                    |
| FLAIR                       | ax    | 10000     | 140     | 24.0     | 4                    |
| DSC Perfusion               | ax    | 1677      | 40      | 24.0     | 4                    |
| T1 fs WATS (+C)             | ax    | 13        | 6       | 24.0     | 1(isotropic)         |
| T1 TSE (+C)                 | ax    | 400-680   | 12      | 24.0     | 4                    |

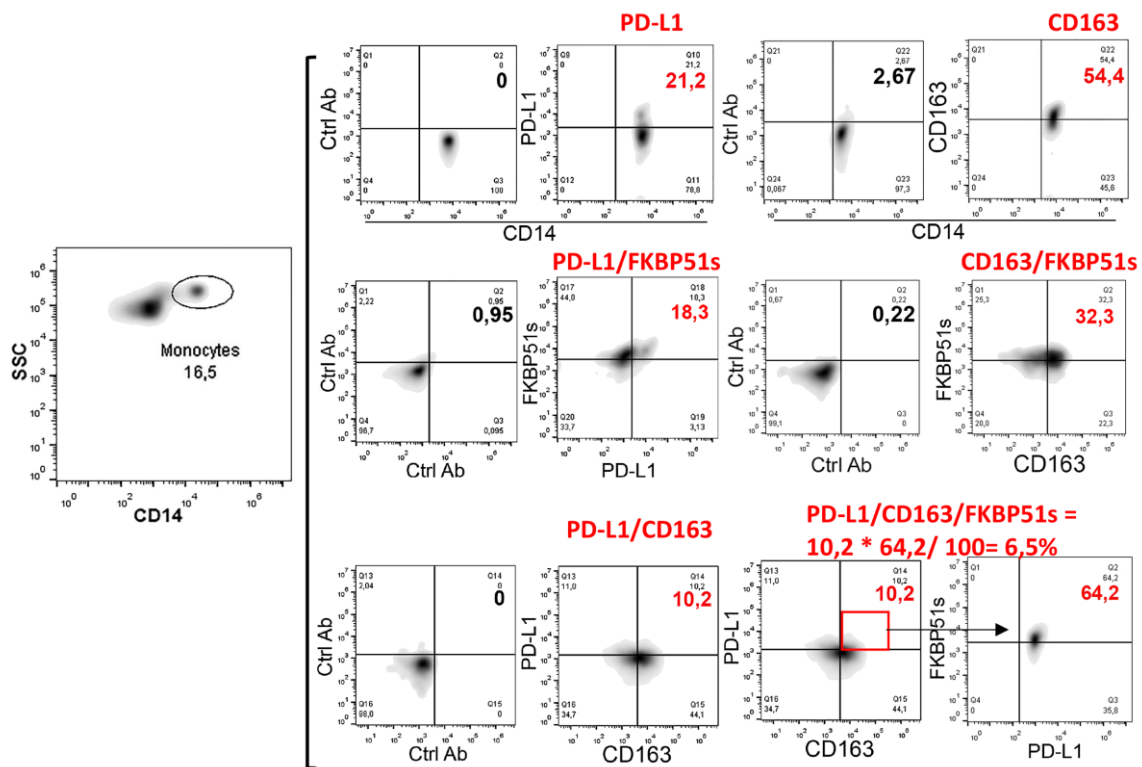

**Fig. S1** Representative flow cytometry histograms of CD14/SSc-gated monocytes (left) and the CD14<sup>+</sup> subsets analysed.

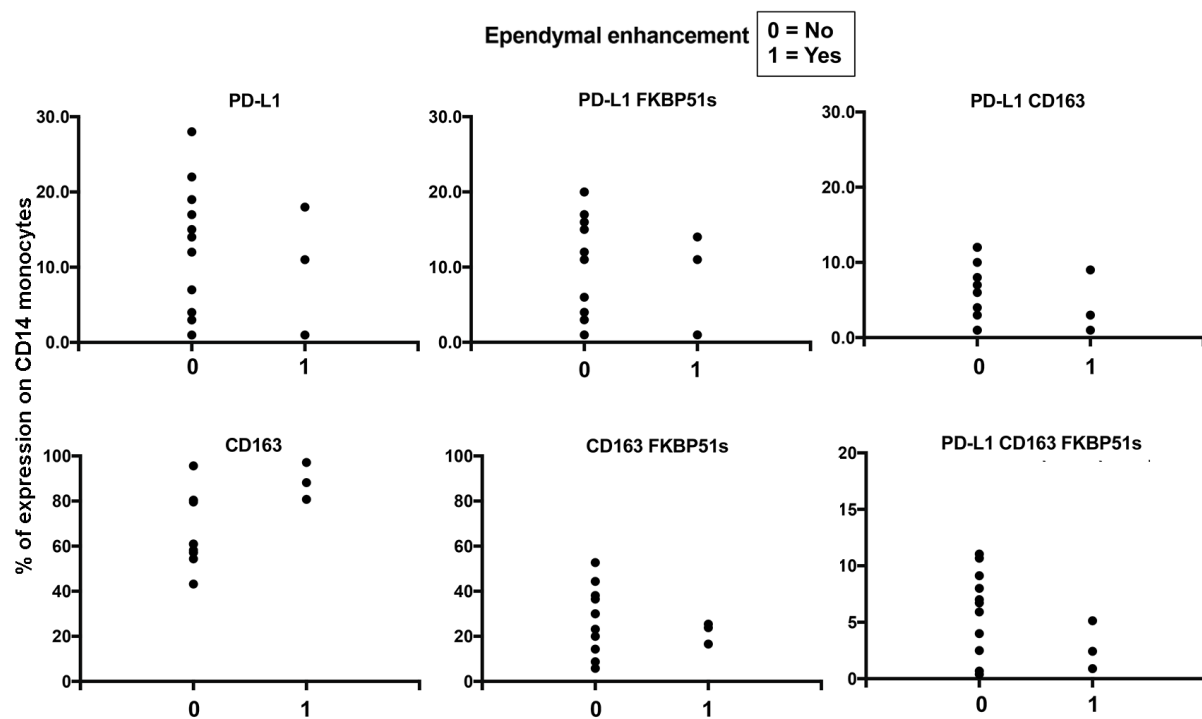

Fig S2

**Fig. S2** M2-monocyte subsets representation according to ependymal enhancement. Graphs were generated using Prism GraphPad 7.0a Macintosh. Linear regression and Pearson correlation coefficient did not measure any linear relationship between the variables.

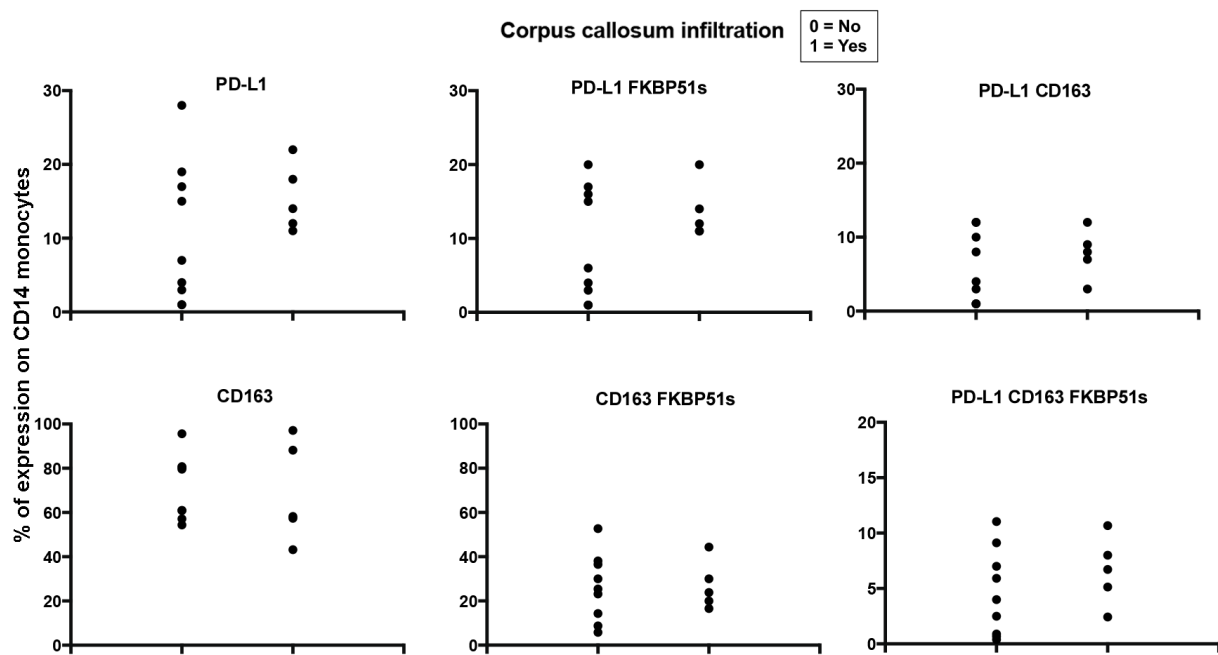

Fig S3

**Fig. S3** M2-monocyte subsets representation according to corpus callosum infiltration. Graphs were generated using Prism GraphPad 7.0a Macintosh. Linear regression and Pearson correlation coefficient did not measure any linear relationship between the variables.



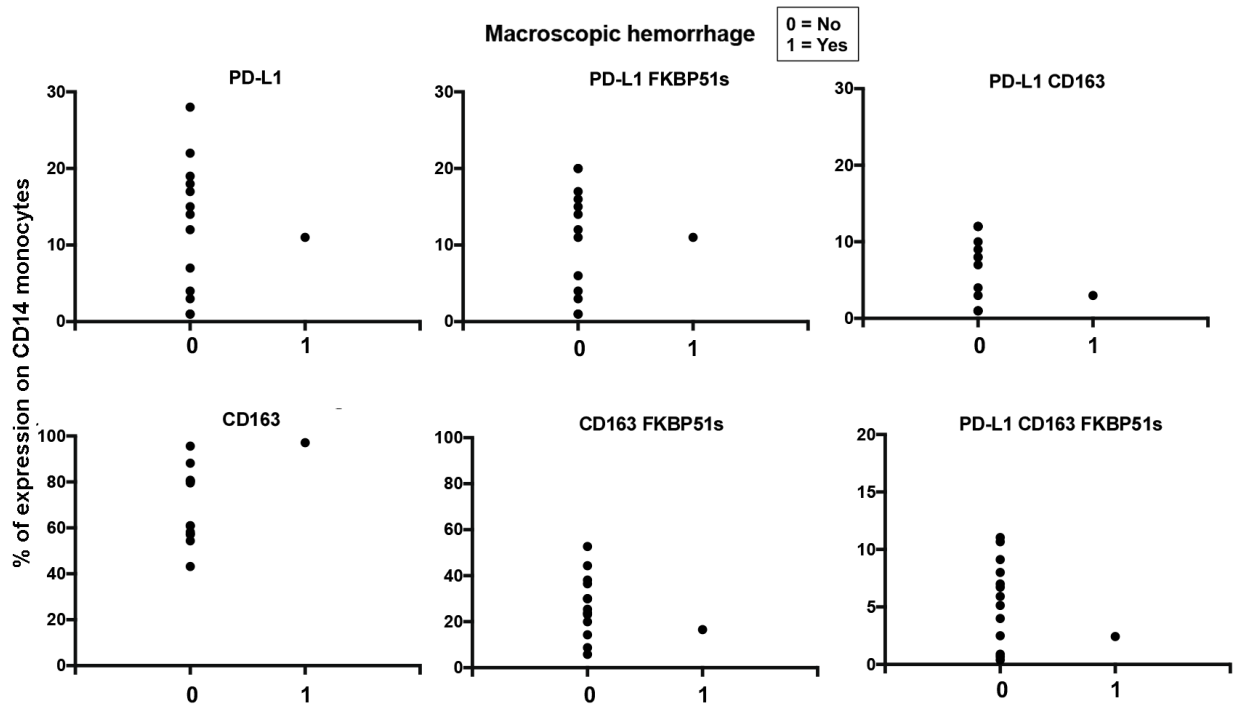

Fig S5

**Fig. S5** M2-monocyte subsets representation according to macroscopic hemorrhage. Graphs were generated using Prism GraphPad 7.0a Macintosh. Linear regression and Pearson correlation coefficient did not measure any linear relationship between the variables.

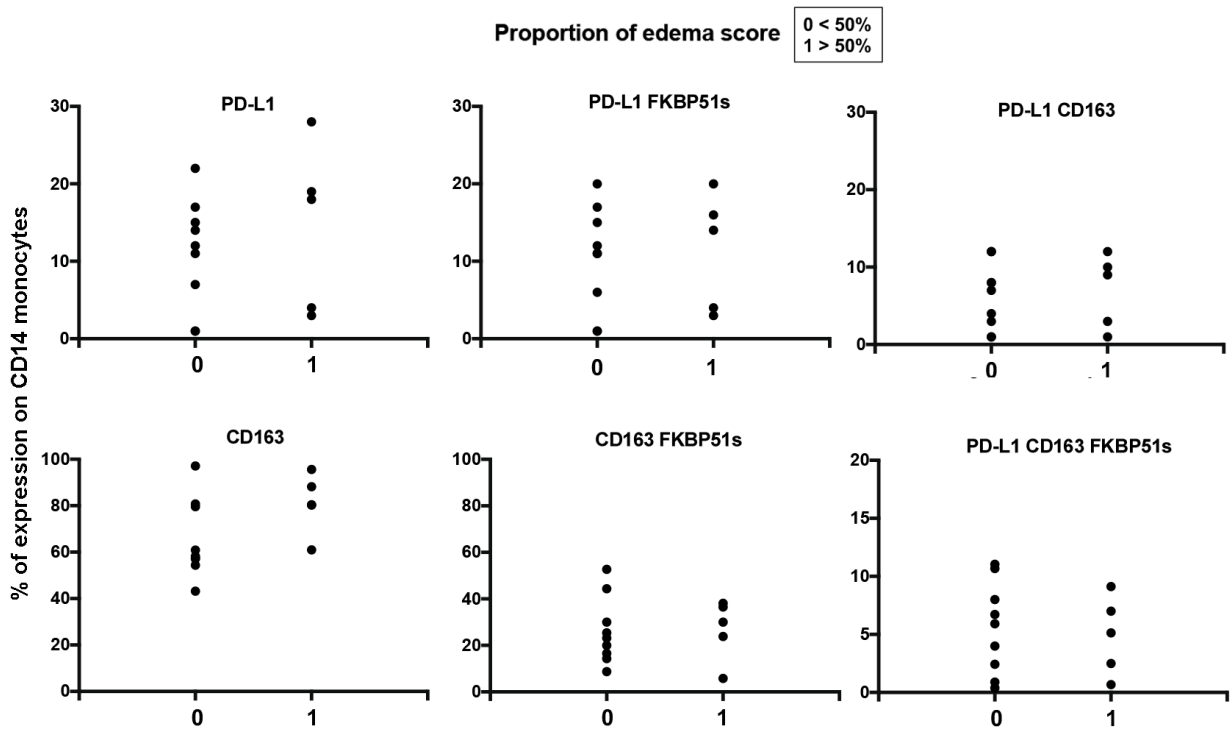

Fig S6

**Fig. S6** M2-monocyte subsets representation according to the edema score . Graphs were generated using Prism GraphPad 7.0a Macintosh. Linear regression and Pearson correlation coefficient did not measure any linear relationship between the variables.



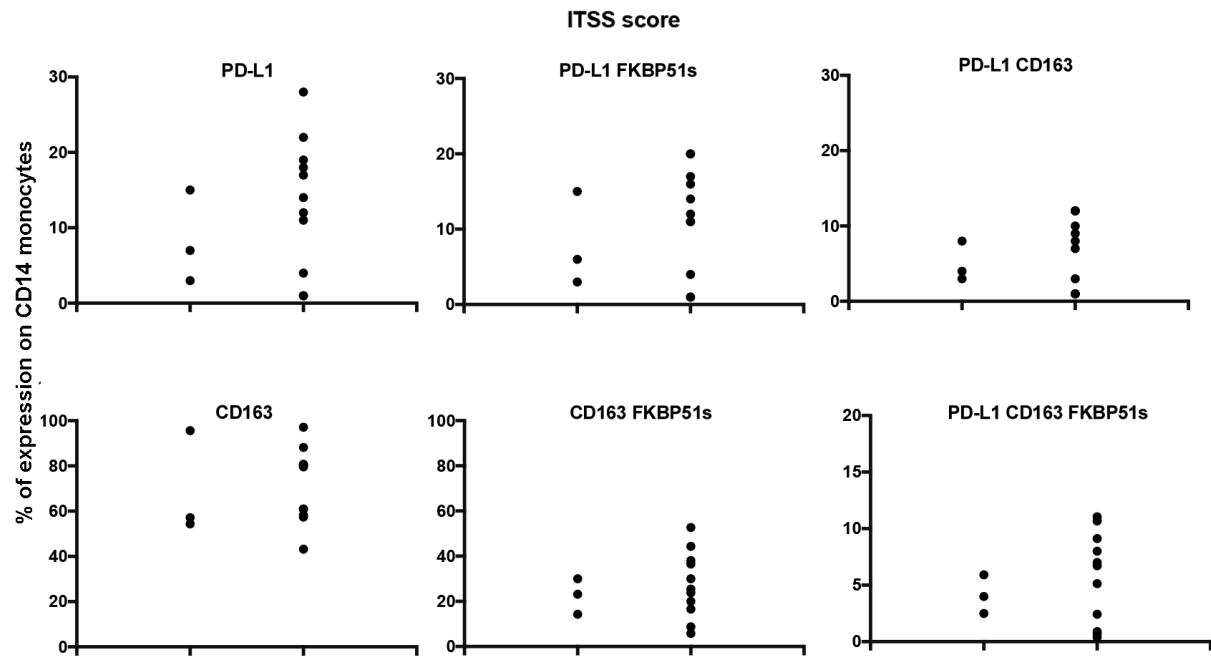

Fig S7

**Fig. S7** M2-monocyte subsets representation according to the score of intratumoral susceptibility signal intensity (ITSS). Graphs were generated using Prism GraphPad 7.0a Macintosh. Linear regression and Pearson correlation coefficient did not measure any linear relationship between the variables.
